# Supplementary material
Source: ML conference proceedings conference paper supplement (https://openreview.net/forum?id=CES-KyrKcTM)
Supplement: supplementary_material [file attachment]

# Robustness\_Code\_W&B\_Sweep

October 5, 2021

```
[0]: %%capture
      !pip install wandb pytorch-lightning wandb
```

```
[0]: import wandb
      wandb.login()
```

```
[0]: <IPython.core.display.Javascript object>
```

```
wandb: Appending key for api.wandb.ai to your netrc file:
/root/.netrc
```

```
[0]: True
```

```
[0]: %%writefile train.py
      import sys

      import wandb
      import torch
      import torchvision

      import numpy as np
      import torch.nn.functional as F

      from math import log
      from torch import Tensor
      from typing import Optional, List

      from torch import nn
      from torch.utils.data.dataloader import DataLoader
      from torch.utils.data import random_split

      from torchvision import transforms
      from torchvision.datasets import CIFAR10, CIFAR100, MNIST, FashionMNIST
      from torchvision.models import resnet34

      from numpy.testing import assert_array_almost_equal

      import pytorch_lightning as pl
```

```

from pytorch_lightning.loggers import CSVLogger, WandbLogger

from torchmetrics import Accuracy

csv_logger = CSVLogger("drive/MyDrive/moments-penalization/logs",
    ↪name="cifar100")

#### DATASET WITH NOISE ####

class MNISTNOISY(FashionMNIST):
    def __init__(self, root, train=True, transform=None,
    ↪target_transform=None, download=False, nosiy_rate=0.0,
    ↪asym=False):
        super().__init__(root, train=train, transform=transform,
    ↪target_transform=target_transform, download=download,)

        # Save targets before we shuffle
        self.original_targets = self.targets.detach().clone()

        if asym:
            # automobile <- truck, bird -> airplane, cat <-> dog, deer -> horse
            source_class = [9, 2, 3, 5, 4]
            target_class = [1, 0, 5, 3, 7]
            for s, t in zip(source_class, target_class):
                cls_idx = np.where(np.array(self.targets) == s)[0]
                n_noisy = int(nosiy_rate * cls_idx.shape[0])
                noisy_sample_index = np.random.choice(cls_idx, n_noisy, replace=False)
                for idx in noisy_sample_index:
                    self.targets[idx] = t

        elif nosiy_rate > 0:
            n_samples = len(self.targets)
            n_noisy = int(nosiy_rate * n_samples)
            print("%d Noisy samples" % (n_noisy))
            class_index = [np.where(np.array(self.targets) == i)[0] for i in
    ↪range(10)]
            class_noisy = int(n_noisy / 10)
            noisy_idx = []
            for d in range(10):
                noisy_class_index = np.random.choice(class_index[d], class_noisy,
    ↪replace=False)
                noisy_idx.extend(noisy_class_index)
                print("Class %d, number of noisy % d" % (d, len(noisy_class_index)))
            for i in noisy_idx:

```

```

        self.targets[i] = self.other_class(n_classes=10, current_class=self.
→targets[i])
        print(len(noisy_idx))
        print("Print noisy label generation statistics:")
        for i in range(10):
            n_noisy = np.sum(np.array(self.targets) == i)
            print("Noisy class %s, has %s samples." % (i, n_noisy))

def __getitem__(self, index: int):
    item = super().__getitem__(index)

    original_target = self.original_targets[index]

    return item[0], item[1], original_target, item[1] != original_target

def other_class(self, n_classes, current_class):
    """
    Returns a list of class indices excluding the class indexed by class_ind
    :param nb_classes: number of classes in the task
    :param class_ind: the class index to be omitted
    :return: one random class that != class_ind
    """
    if current_class < 0 or current_class >= n_classes:
        error_str = "class_ind must be within the range (0, nb_classes - 1)"
        raise ValueError(error_str)

    other_class_list = list(range(n_classes))
    other_class_list.remove(current_class)
    other_class = np.random.choice(other_class_list)

    return other_class

class CIFAR10NOISY(CIFAR10):
    def __init__(self, root, train=True, transform=None,
→target_transform=None, download=False, noisy_rate=0.0,
→asym=False):
        super().__init__(root, train=train, transform=transform,
→target_transform=target_transform, download=download,)

        # Save targets before we shuffle
        self.original_targets = self.targets.copy()

    if asym:

```

```

# automobile <- truck, bird -> airplane, cat <-> dog, deer -> horse
source_class = [9, 2, 3, 5, 4]
target_class = [1, 0, 5, 3, 7]
for s, t in zip(source_class, target_class):
    cls_idx = np.where(np.array(self.targets) == s)[0]
    n_noisy = int(nosiy_rate * cls_idx.shape[0])
    noisy_sample_index = np.random.choice(cls_idx, n_noisy, replace=False)
    for idx in noisy_sample_index:
        self.targets[idx] = t

elif nosiy_rate > 0:

    n_samples = len(self.targets)
    n_noisy = int(nosiy_rate * n_samples)
    print("%d Noisy samples" % (n_noisy))
    class_index = [np.where(np.array(self.targets) == i)[0] for i in
→range(10)]
    class_noisy = int(n_noisy / 10)
    noisy_idx = []
    for d in range(10):
        noisy_class_index = np.random.choice(class_index[d], class_noisy,
→replace=False)
        noisy_idx.extend(noisy_class_index)
        print("Class %d, number of noisy % d" % (d, len(noisy_class_index)))
    for i in noisy_idx:
        self.targets[i] = self.other_class(n_classes=10, current_class=self.
→targets[i])
    print(len(noisy_idx))
    print("Print noisy label generation statistics:")
    for i in range(10):
        n_noisy = np.sum(np.array(self.targets) == i)
        print("Noisy class %s, has %s samples." % (i, n_noisy))

def __getitem__(self, index: int):
    item = super().__getitem__(index)

    original_target = self.original_targets[index]

    return item[0], item[1], original_target, item[1] != original_target

def other_class(self, n_classes, current_class):
    """
    Returns a list of class indices excluding the class indexed by class_ind
    :param nb_classes: number of classes in the task

```

```

        :param class_ind: the class index to be omitted
        :return: one random class that != class_ind
        """
        if current_class < 0 or current_class >= n_classes:
            error_str = "class_ind must be within the range (0, nb_classes - 1)"
            raise ValueError(error_str)

        other_class_list = list(range(n_classes))
        other_class_list.remove(current_class)
        other_class = np.random.choice(other_class_list)

        return other_class

class CIFAR100NOISY(CIFAR100):
    def __init__(self, root, train=True, transform=None, target_transform=None,
        ↳download=False, nosiy_rate=0.0, asym=False, seed=0):

        super().__init__(root, train=train, download=download,
        ↳transform=transform, target_transform=target_transform)

        # Save targets before we shuffle
        self.original_targets = self.targets.copy()

        if asym:
            """mistakes are inside the same superclass of 10 classes, e.g. 'fish'
            """
            nb_classes = 100
            P = np.eye(nb_classes)
            n = nosiy_rate
            nb_superclasses = 20
            nb_subclasses = 5

            if n > 0.0:
                for i in np.arange(nb_superclasses):
                    init, end = i * nb_subclasses, (i+1) * nb_subclasses
                    P[init:end, init:end] = self.
        ↳build_for_cifar100(nb_subclasses, n)

                y_train_noisy = self.multiclass_noisify(np.array(self.
        ↳targets), P=P, random_state=seed)
                actual_noise = (y_train_noisy != np.array(self.targets)).
        ↳mean()

                assert actual_noise > 0.0
                print('Actual noise %.2f' % actual_noise)
                self.targets = y_train_noisy.tolist()
        return

```

```

elif nosiy_rate > 0:
    n_samples = len(self.targets)
    n_noisy = int(nosiy_rate * n_samples)
    print("%d Noisy samples" % (n_noisy))
    class_index = [np.where(np.array(self.targets) == i)[0] for i in
↪range(100)]
    class_noisy = int(n_noisy / 100)
    noisy_idx = []
    for d in range(100):
        noisy_class_index = np.random.choice(class_index[d], class_noisy,
↪replace=False)
        noisy_idx.extend(noisy_class_index)
        print("Class %d, number of noisy % d" % (d,
↪len(noisy_class_index)))
    for i in noisy_idx:
        self.targets[i] = self.other_class(n_classes=100,
↪current_class=self.targets[i])
    print(len(noisy_idx))
    print("Print noisy label generation statistics:")
    for i in range(100):
        n_noisy = np.sum(np.array(self.targets) == i)
        print("Noisy class %s, has %s samples." % (i, n_noisy))
    return

def __getitem__(self, index: int):
    item = super().__getitem__(index)

    original_target = self.original_targets[index]

    return item[0], item[1], original_target, item[1] != original_target

def build_for_cifar100(self, size, noise):
    """ random flip between two random classes.
    """
    assert(noise >= 0.) and (noise <= 1.)

    P = (1. - noise) * np.eye(size)
    for i in np.arange(size - 1):
        P[i, i+1] = noise

    # adjust last row
    P[size-1, 0] = noise

    assert_array_almost_equal(P.sum(axis=1), 1, 1)
    return P

```

```

def multiclass_noisify(self, y, P, random_state=0):
    """ Flip classes according to transition probability matrix T.
    It expects a number between 0 and the number of classes - 1.
    """

    assert P.shape[0] == P.shape[1]
    assert np.max(y) < P.shape[0]

    # row stochastic matrix
    assert_array_almost_equal(P.sum(axis=1), np.ones(P.shape[1]))
    assert (P >= 0.0).all()

    m = y.shape[0]
    new_y = y.copy()
    flipper = np.random.RandomState(random_state)

    for idx in np.arange(m):
        i = y[idx]
        # draw a vector with only an 1
        flipped = flipper.multinomial(1, P[i, :], 1)[0]
        new_y[idx] = np.where(flipped == 1)[0]

    return new_y

def other_class(self, n_classes, current_class):
    """
    Returns a list of class indices excluding the class indexed by class_ind
    :param nb_classes: number of classes in the task
    :param class_ind: the class index to be omitted
    :return: one random class that != class_ind
    """
    if current_class < 0 or current_class >= n_classes:
        error_str = "class_ind must be within the range (0, nb_classes - 1)"
        raise ValueError(error_str)

    other_class_list = list(range(n_classes))
    other_class_list.remove(current_class)
    other_class = np.random.choice(other_class_list)
    return other_class

#### LOSSES ####

```

```

def generalized_cross_entropy(input: Tensor, target: Tensor, q:
    ↳Optional[float]=0.7,
                                k: Optional[float]=None, weights:
    ↳Optional[Tensor]=None,
                                version:Optional[int]=1, num_classes:
    ↳Optional[int]=10):
    """
    Interpolates between a linear function ( $q = 1$ ) and log function ( $q = 0$ ).

    Loss function introduced in "Generalized Cross Entropy Loss for Training Deep
    Neural Networks with Noisy Labels" by Zhilu Zhang and Mert R. Sabuncu

    Args:
        input: tensor of size (N, C) where N is number of samples and C is the
            number of classes. The values of the matrix should not be normalized to
            represent probabilities, this will be done by the function.
        target: tensor of size (N) where each value is between 0 and C-1.
        q: Interpolation parameter that selects the shape of the function. Values
            close to 1 increase robustness but decrease convergence and a value
            close to 0 produces a different behavior. Default: 0.7 as in the paper.
        k: Truncation threshold, larger values lead to tighter bounds and hence more
            noise-robustness, too large of a threshold would precipitate too many
            discarded samples for training. Optimal value depends on the noise level
            in the labels. The value used in the paper is 0.5.
        weights (Tensor, optional): Selects which samples to use for training. If k
            is not none but no weights are given then they will be computed by
            thresholding the probabilities of input with k.
        version: Selects the implementation version of the method. Version 1 uses
            gather approach, version 2 uses 1 hot encoding approach. Default: 1
        num_classes: Number of classes in the target vector. Required for version 2.

    Example::

        >>> # input is of size N x C = 3 x 5
        >>> input = torch.randn(3, 5, requires_grad=True)
        >>> # each element in target has to have 0 <= value < C
        >>> target = torch.tensor([1, 0, 4])
        >>> output = generalized_cross_entropy(input, target)
        >>> output.backward()

    """

    prob = input.softmax(dim=1)

    if version == 1:
        f_j = prob.gather(dim=1, index=target.unsqueeze(dim=1)).flatten()
    elif version == 2:

```



```

    f_j = (prob * torch.nn.functional.one_hot(target, num_classes)).sum(dim=1)

    losses = (1 - f_j ** q) / q

    # Should we truncate?
    if k is not None:

        # Compute weights
        if weights is None:
            weights = 1.0 * (f_j > k)

        # Use eq (12)
        losses = weights * losses + (1 - weights) * (1 - k ** q) / q

    return losses.mean()

def term_transformation(losses: Tensor, t: Optional[int]=-2, version:
    ↪Optional[int]=1):
    """
    Computes the tilted loss with the tilt value of t.

    Tilted minimization problem introduced in "Tilted Empirical Risk Minimization"
    by Tian Li, Ahmad Beirami, Maziar Sanjabi, Virginia Smith

    Args:
        losses: tensor of size (N) where N is number of samples and the entries are
            value of the loss function for each sample.
        t: Interpolation parameter that selects what objective to minimize. Positive
            values tilt towards max loss recovered when t approaches +inf, negative
            values tilt towards min loss recovered when t approaches -inf, and the
            standard mean value optimization for t close to 0. Default: -2 as in the
            paper.
        version: Selects the implementation version of the method. Version 1 uses
            logsumexp method to preserve precision, version 2 is the naive
            implementation. Default: 1

    Example::

        >>> # input is of size N x C = 3 x 5
        >>> input = torch.randn(3, 5, requires_grad=True)
        >>> # each element in target has to have 0 <= value < C
        >>> target = torch.tensor([1, 0, 4])
        >>> losses = torch.nn.functional.cross_entropy(input, target,
    ↪reduction="none")
        >>> output = term_transformation(losses, t=-2)

```

```

>>> output.backward()

"""

if version == 1:
    loss = (t * losses - log(losses.shape[0])).logsumexp(dim=0) / t
elif version == 2:
    loss = (t * losses).exp().mean().log() / t

return loss

def taylor_cross_entropy(input: Tensor, target: Tensor, t: Optional[int]=2,
                        version: Optional[int]=1, num_classes: Optional[int]=10):
    """
    Approximates the cross entropy using the Taylor expansion up to a term t.

    Method introduced in "Can Cross Entropy Loss Be Robust to Label Noise?" by
    Lei Feng, Senlin Shu, Zhuoyi Lin, Fengmao Lv, Li Li, Bo An

    Args:
        input: tensor of size (N, C) where N is number of samples and C is the
            number of classes. The values of the matrix should not be normalized to
            represent probabilities, this will be done by the function.
        target: tensor of size (N) where each value is between 0 and C-1.
        t: Taylor series order to be used for the approximation. Default: 2 as in
        ↪ the
            paper.
        version: Selects the implementation version of the method. Version 1 uses
            gather approach, version 2 uses 1 hot encoding approach. Default: 1
        num_classes: Number of classes in the target vector. Required for version 2.

    Example::

        >>> # input is of size N x C = 3 x 5
        >>> input = torch.randn(3, 5, requires_grad=True)
        >>> # each element in target has to have 0 <= value < C
        >>> target = torch.tensor([1, 0, 4])
        >>> output = taylor_cross_entropy(input, target)
        >>> output.backward()

    """

    prob = input.softmax(dim=1)
    if version == 1:
        f_y = prob.gather(dim=1, index=target.unsqueeze(dim=1)).flatten()
    elif version == 2:

```

```

    f_y = (prob * torch.nn.functional.one_hot(target, num_classes)).sum(dim=1)

    losses = 0

    for k in range(1, t+1):
        losses += (1 - f_y)**t / t

    return losses.mean()

def normalized_cross_entropy(input: Tensor, target: Tensor, version:
    ↪Optional[int]=1,
                                num_classes:Optional[int]=10):
    """
    Normalized cross entropy, symmetric loss.

    Method introduced in "Normalized Loss Functions for Deep Learning with Noisy
    Labels" by Xingjun Ma, Hanxun Huang, Yisen Wang, Simone Romano, Sarah Erfani,
    James Bailey

    Args:
        input: tensor of size (N, C) where N is number of samples and C is the
            number of classes. The values of the matrix should not be normalized to
            represent probabilities, this will be done by the function.
        target: tensor of size (N) where each value is between 0 and C-1.
        version: Selects the implementation version of the method. Version 1 uses
            gather approach, version 2 uses 1 hot encoding approach. Default: 1
        num_classes: Number of classes in the target vector. Required for version 2.

    Example::

        >>> # input is of size N x C = 3 x 5
        >>> input = torch.randn(3, 5, requires_grad=True)
        >>> # each element in target has to have 0 <= value < C
        >>> target = torch.tensor([1, 0, 4])
        >>> output = normalized_cross_entropy(input, target)
        >>> output.backward()

    """
    log_prob = torch.nn.functional.log_softmax(input, dim=1)
    if version == 1:
        log_fy = log_prob.gather(dim=1, index=target.unsqueeze(dim=1)).flatten()
    elif version == 2:
        log_fy = (log_prob * torch.nn.functional.one_hot(target, num_classes)).
    ↪sum(dim=1)

    return (log_fy / log_prob.sum(dim=1)).mean()

```

```

def reverse_cross_entropy(input: Tensor, target: Tensor, num_classes:
    ↪Optional[int]=10):
    """
    Reverse crosss entropy, used to make cross entropy a symmetric loss.

    Method introduced in "Symmetric Cross Entropy for Robust Learning with Noisy
    Labels" by Yisen Wang, Xingjun Ma, Zaiyi Chen, Yuan Luo, Jinfeng Yi, James
    ↪Bailey

    Args:
        input: tensor of size (N, C) where N is number of samples and C is the
            number of classes. The values of the matrix should not be normalized to
            represent probabilities, this will be done by the function.
        target: tensor of size (N) where each value is between 0 and C-1.
        num_classes: Number of classes in the target vector.

    Example::

        >>> # input is of size N x C = 3 x 5
        >>> input = torch.randn(3, 5, requires_grad=True)
        >>> # each element in target has to have 0 <= value < C
        >>> target = torch.tensor([1, 0, 4])
        >>> output = reverse_cross_entropy(input, target)
        >>> output.backward()

    """
    prob = input.softmax(dim=1).clamp(min=1e-7)
    log_1hot = torch.nn.functional.one_hot(target, num_classes).float().
    ↪clamp(min=1e-4).log()

    return -(prob * log_1hot).sum(dim=1).mean()

def moments_penalization(losses: Tensor, lambdas:List[float]=[1.0,],
    convex: Optional[bool]=True, z_mean:
    ↪Optional[Tensor]=None,
    normalize: Optional[bool]=True):
    """
    Reverse crosss entropy, used to make cross entropy a symmetric loss.

    Introduced in current paper.

    Args:
        losses: tensor of size (N) where N is number of samples and the entries are
            value of the loss function for each sample.

```

*lambdas: list of floating number representing the penalization factor for the moments of the loss. Examples, `lamdas = [1.0, -0.5]` is equivalent to `1.0*mean(losses) - 0.5*var(losses)`. Default: `[1.0,]` equivalent to optimizing the mean.*

*convex: make negative weights be 0 to preserve the convexity of the loss function at the cost of possible reduced penalization impact. Default: `False`*

*z\_mean: mean vector to use to calculate weights.*

*Example::*

```
>>> # input is of size N x C = 3 x 5
>>> input = torch.randn(3, 5, requires_grad=True)
>>> # each element in target has to have 0 <= value < C
>>> target = torch.tensor([1, 0, 4])
>>> losses = torch.nn.functional.cross_entropy(input, target,
→reduction="none")
>>> output = moments_penalization(losses, [1.0, -0.5])
>>> output.backward()

"""
z      = losses.detach()

if z_mean is None:
    z_mean = z.mean()

weights = torch.zeros_like(z)
for k, lambda in enumerate(lambdas):
    if lambda:
        if k == 0:
            weights += lambda
        else:
            weights += lambda * (z - z_mean) ** k

if convex:
    weights = weights.clip(min=0.0)

if normalize:
    weights = weights / weights.mean()

return (weights * losses).mean()

def moments_penalization_cross_entropy(losses: Tensor, lambda_1=1.0, lambda_2=0.
→0,
                                     convex: Optional[bool]=True):
    """
```

Reverse cross entropy, used to make cross entropy a symmetric loss.

Introduced in current paper.

Args:

*losses*: tensor of size (*N*) where *N* is number of samples and the entries are value of the loss function for each sample.

*lambdas*: list of floating number representing the penalization factor for the moments of the loss. Examples, *lambdas* = [1.0, -0.5] is equivalent to  $1.0 * \text{mean}(\text{losses}) - 0.5 * \text{var}(\text{losses})$ . Default: [1.0,] equivalent to optimizing the mean.

*convex*: make negative weights be 0 to preserve the convexity of the loss function at the cost of possible reduced penalization impact. Default: ☐

→ True

*z\_mean*: mean vector to use to calculate weights.

Example::

```
>>> # input is of size N x C = 3 x 5
>>> input = torch.randn(3, 5, requires_grad=True)
>>> # each element in target has to have 0 <= value < C
>>> target = torch.tensor([1, 0, 4])
>>> losses = torch.nn.functional.cross_entropy(input, target,
→reduction="none")
>>> output = moments_penalization(losses, [1.0, -0.5])
>>> output.backward()

"""
z          = losses.detach()
z_mean     = z.mean()
x_values   = (-z).exp()
weights    = lambda_1 + lambda_2 * (z - z_mean)

# Critical point (CP) where convexity breaks, second derivative < 0
x_c        = (lambda_1 / (2 * lambda_2) - z_mean / 2 + 1).exp()

if convex and (x_values < x_c).sum():
    l_c = -x_c.log()                # loss value at CP
    w_c = lambda_1 + lambda_2 * (l_c - z_mean)  # weight value at CP

# derivative of the weights*loss at CP
d_c = -1/x_c * (l_c * lambda_2 + lambda_1 + lambda_2 * (l_c - z_mean))

# interpolate
idx        = x_values < x_c
weights[idx] = (w_c * l_c + d_c * (x_values[idx] - x_c)) / z[idx]
```

```

    return (weights * losses).mean()

#### MODEL ####

class Model(pl.LightningModule):

    """
    Model used in ICCV2019 paper "Symmetric Cross Entropy for Robust Learning
    ↪with Noisy Labels"
    Reproduced from https://github.com/HanxunH/SCELoss-Reproduce
    """

    def __init__(self, params):
        super().__init__()

        self.save_hyperparameters(params)

        if self.hparams["dataset"] == "CIFAR-10":

            self.conv_layers = nn.Sequential(
                self.conv_block(3, 64, 3),
                self.conv_block(64, 64, 3),
                nn.MaxPool2d(kernel_size=2, stride=2),
                self.conv_block(64, 128, 3),
                self.conv_block(128, 128, 3),
                nn.MaxPool2d(kernel_size=2, stride=2),
                self.conv_block(128, 196, 3),
                self.conv_block(196, 196, 3),
                nn.MaxPool2d(kernel_size=2, stride=2)
            )

            self.fc_layers = nn.Sequential(
                nn.Linear(3136, 256),
                nn.BatchNorm1d(256),
                nn.ReLU(),
                nn.Linear(256, 10)
            )

            self.acc_metric = Accuracy(average='none', num_classes=10)

            self.acc_clean_metric = Accuracy()
            self.acc_noisy_metric = Accuracy()

        elif self.hparams["dataset"] == "CIFAR-100":
            self.resnet = resnet34(num_classes=100)
            self.acc_metric = Accuracy(average='none', num_classes=100)

```

```

elif self.hparams["dataset"] == "MNIST":
    self.conv_layers = nn.Sequential(
        self.conv_block(1, 32, 3),
        self.conv_block(32, 32, 3),
        nn.MaxPool2d(kernel_size=3, stride=2),
        self.conv_block(32, 64, 3),
        self.conv_block(64, 64, 3),
        nn.MaxPool2d(kernel_size=3, stride=2),
    )

    self.fc_layers = nn.Sequential(
        nn.Linear(2304, 1152),
        nn.ReLU(inplace=True),
        nn.Linear(1152, 576),
        nn.ReLU(inplace=True),
        nn.Linear(576, 10)
    )

    self.acc_metric = Accuracy(average='none', num_classes=10)

    self.acc_clean_metric = Accuracy()
    self.acc_noisy_metric = Accuracy()

    # self.sceloss = SCELoss(self.hparams["sce_alpha"], self.
    ↪ hparams["sce_beta"])

    self.Z_bar = None

    self.max_acc = 0

def conv_block(self, in_planes, out_planes, kernel_size=3):
    """Convolutional Block"""

    return nn.Sequential(
        nn.Conv2d(
            in_planes,
            out_planes,
            kernel_size=kernel_size,
            padding=(kernel_size - 1) // 2
        ),
        nn.BatchNorm2d(out_planes),
        nn.ReLU(inplace=True)
    )

```



```

def forward(self, x):
    if self.hparams["dataset"] == "CIFAR-10":
        return self.fc_layers(self.conv_layers(x).view(-1, 3136))

    elif self.hparams["dataset"] == "CIFAR-100":
        return self.resnet(x)

    elif self.hparams["dataset"] == "MNIST":
        return self.fc_layers(self.conv_layers(x).view(-1, 2304))

def calculate_weights(self, losses, log=True):

    Z = losses.detach()

    z_mean = Z.mean()

    l1 = self.hparams["lambda_1"]
    l2 = self.hparams["lambda_2"]
    l3 = self.hparams["lambda_3"]

    weights = (l1 + (Z - z_mean) * l2 + (Z - z_mean)**2 * l3).clip(min=0.0)

    if log:
        self.log_dict({
            "z-mean":      z_mean,
            "z-var":       Z.var(),
            "z-min":       Z.min(),
            "z-max":       Z.max(),
            "w-max":       weights.max(),
            "w-min":       weights.min(),
            "w-mean":      weights.mean(),
        })

    return weights

def training_step(self, batch, batch_idx):
    x, y_target, y_target_original, is_noisy_y = batch
    y_hat = self(x)

    if self.hparams["loss_function"] == "moments":

        l1, l2 = [1.0, -0.5]

```

```

self.hparams["lambda_1"] = 11
self.hparams["lambda_2"] = 12
self.hparams["lambda_3"] = 0.0

losses = nn.functional.cross_entropy(y_hat, y_target, reduction="none")
loss = moments_penalization(losses, [11, 12], normalize=self.
→hparams["normalize"])

elif self.hparams["loss_function"] == "moments-var":

    11, 12 = self.hparams["lambda_1"], self.hparams["lambda_2"]

    # self.hparams["lambda_1"] = 11
    # self.hparams["lambda_2"] = 12
    # self.hparams["lambda_3"] = 0.0

    losses = nn.functional.cross_entropy(y_hat, y_target, reduction="none")
    loss = moments_penalization(losses, [11, 12], normalize=self.
→hparams["normalize"])

elif self.hparams["loss_function"] == "moments-convex":

    11, 12 = self.hparams["lambda_1"], self.hparams["lambda_2"]

    losses = nn.functional.cross_entropy(y_hat, y_target, reduction="none")
    loss = moments_penalization_cross_entropy(losses, 11, 12, convex=True)

elif self.hparams["loss_function"] == "moments-skew":

    11, 12, 13 = [1.0, -0.5, self.hparams["lambda_3"]]

    self.hparams["lambda_1"] = 11
    self.hparams["lambda_2"] = 12

    losses = nn.functional.cross_entropy(y_hat, y_target, reduction="none")
    loss = moments_penalization(losses, [11, 12, 13])

elif self.hparams["loss_function"] == "moments-mean":

    11, 12 = self.hparams["lambda_1"], self.hparams["lambda_2"]

    self.hparams["lambda_1"] = 11
    self.hparams["lambda_2"] = 12
    self.hparams["lambda_3"] = 0.0

    alpha = self.hparams["moments_alpha"]

```

```

num_classes = 100 if self.hparams["dataset"] == "CIFAR-100" else 10

losses = nn.functional.cross_entropy(y_hat, y_target, reduction="none")
z = losses.detach()

# Compute mean loss for each class
if not hasattr(self, 'class_mean'):
    self.class_mean = torch.zeros(num_classes, device=z.device)

z_mean = torch.zeros_like(z)
for c in range(num_classes):
    mask = (y_target == c)
    if mask.any():
        self.class_mean[c] = alpha * z[mask].mean() + (1.0 - alpha) * self.
↪class_mean[c]
        z_mean[mask] = self.class_mean[c]

    if self.hparams["wandb_log_hist"]:
        wandb.log({"class-mean": wandb.Histogram(self.class_mean.cpu().
↪numpy())})

loss = moments_penalization(losses, [l1, l2], z_mean=z_mean)

elif self.hparams["loss_function"] == "normalized-symmetric":

    loss1 = normalized_cross_entropy(y_hat, y_target, num_classes=100 if
↪self.hparams["dataset"] == "CIFAR-100" else 10)
    loss2 = reverse_cross_entropy(y_hat, y_target, num_classes=100 if self.
↪hparams["dataset"] == "CIFAR-100" else 10)

    loss = 10 * loss1 + 1 * loss2

elif self.hparams["loss_function"] == "term":

    losses = nn.functional.cross_entropy(y_hat, y_target, reduction="none")
    loss = term_transformation(losses, t=-0.5)

elif self.hparams["loss_function"] == "generalized":

    loss = generalized_cross_entropy(y_hat, y_target, q=0.7,
↪num_classes=100 if self.hparams["dataset"] == "CIFAR-100" else 10)

elif self.hparams["loss_function"] == "taylor":

    loss = taylor_cross_entropy(y_hat, y_target, t=2, num_classes=100 if
↪self.hparams["dataset"] == "CIFAR-100" else 10)

```

```

elif self.hparams["loss_function"] == "symmetric":

    loss1 = nn.functional.cross_entropy(y_hat, y_target)
    loss2 = reverse_cross_entropy(y_hat, y_target, num_classes=100 if self.
→hparams["dataset"] == "CIFAR-100" else 10)

    loss = 0.1 * loss1 + 1.0 * loss2

elif self.hparams["loss_function"] == "classical":

    loss = nn.functional.cross_entropy(y_hat, y_target)

self.log("train_loss", loss)

return loss

def validation_step(self, batch, batch_idx, dataloader_idx):
    x, y_target, y_target_original, is_noisy_y = batch
    y_hat = self(x)
    prob = torch.softmax(y_hat, dim=1)

    losses = nn.functional.cross_entropy(y_hat, y_target, reduction="none")
    _, idx = prob.topk(5, dim=1, sorted=True)
    y_pred = prob.argmax(dim=1)

    # Compute only for clean data
    if dataloader_idx == 1:
        self.acc_metric(y_pred, y_target)

    # if dataloader_idx == 0:
    #     if (is_noisy_y == False).sum() > 0:
    #         self.acc_clean_metric(y_pred[is_noisy_y == False],
→y_target[is_noisy_y == False])

    #     if (is_noisy_y == True).sum() > 0:
    #         self.acc_noisy_metric(y_pred[is_noisy_y == True],
→y_target[is_noisy_y == True])

    # losses and weights are returned as array so we can append by summing
    return {
        "num_samples": len(y_target),
        "topk": (idx == y_target[:, None]).sum(dim=0).cumsum(0),
        "losses": [losses,],
        "weights": [self.calculate_weights(losses, log=False),],

```

```

}

def validation_epoch_end(self, validation_outputs):

    class_acc = self.acc_metric.compute()

    self.log_dict({ "class-acc-{}".format(c): a for c, a in
↪enumerate(class_acc)})

    # self.log_dict({
    #     "acc-clean": self.acc_clean_metric.compute(),
    #     "acc-noisy": self.acc_noisy_metric.compute(),
    # })

    for ds, outputs in zip(["noisy", "clean"], validation_outputs):
        num_samples = 0
        topk = 0
        losses = []
        weights = []

        for valid_return in outputs:
            num_samples += valid_return["num_samples"]
            topk += valid_return["topk"]
            losses += valid_return["losses"]           # Append to array
            weights += valid_return["weights"]         # Append to array

        topk = topk / num_samples

        self.log_dict({
            ds+"-top-1-acc": topk[0],
            ds+"-top-2-acc": topk[1],
            ds+"-top-5-acc": topk[4],
        })

        if ds == "clean":
            self.max_acc = max(self.max_acc, topk[0].cpu().item())
            self.log("max_acc", self.max_acc)
            print("Epoch:", self.current_epoch, ", Max accuracy:", self.max_acc,
↪file=sys.stderr)

            if self.hparams["wandb_log_hist"]:
                wandb.log({ds+"-loss-hist": wandb.Histogram(torch.cat(losses).cpu().
↪numpy())})
                wandb.log({ds+"-weights-hist": wandb.Histogram(torch.cat(weights).cpu().
↪numpy())})

```

```

def configure_optimizers(self):
    if self.hparams["dataset"] in ["CIFAR-10", "MNIST"]:

        main_optim = torch.optim.SGD(
            [
                {
                    "params": self.conv_layers.parameters(),
                    "weight_decay": self.hparams["conv_l2_reg"],
                },
                {
                    "params": self.fc_layers.parameters(),
                    "weight_decay": self.hparams["fc_l2_reg"],
                },
            ],
            lr = self.hparams["learning_rate"],
            momentum = 0.9,
            nesterov = True,
        )

    elif self.hparams["dataset"] == "CIFAR-100":

        main_optim = torch.optim.SGD(
            params = self.resnet.parameters(),
            weight_decay = self.hparams["conv_l2_reg"],
            lr = self.hparams["learning_rate"],
            momentum = 0.9,
            nesterov = True,
        )

    if self.hparams["lr_scheduler"] == "stepped":
        lr_scheduler = torch.optim.lr_scheduler.MultiStepLR(
            main_optim,
            milestones=[self.hparams["lr_milestone"], 2*self.
↪hparams["lr_milestone"]],
            gamma=0.1
        )
    elif self.hparams["lr_scheduler"] == "continuous":
        lr_scheduler = torch.optim.lr_scheduler.LambdaLR(
            main_optim,
            lr_lambda = lambda epoch: 1.0 / 10 ** (epoch / self.
↪hparams["lr_milestone"]),
        )

    return [main_optim], [lr_scheduler]

```

```

def prepare_data(self):
    """Downloads and splits CIFAR dataset into training, validation, and test"""

    CIFAR_MEAN = [0.49139968, 0.48215827, 0.44653124]
    CIFAR_STD = [0.24703233, 0.24348505, 0.26158768]

    train_transform = transforms.Compose([
        transforms.RandomCrop(32, padding=4),
        transforms.RandomHorizontalFlip(),
        transforms.ToTensor(),
        transforms.Normalize(CIFAR_MEAN, CIFAR_STD),
    ])

    test_transform = transforms.Compose([
        transforms.ToTensor(),
        transforms.Normalize(CIFAR_MEAN, CIFAR_STD),
    ])

    if self.hparams["dataset"] == "CIFAR-10":
        train_ds = CIFAR10NOISY('data/', True, train_transform, download=True,
                                asym = self.hparams["asym_noise"],
                                nosiy_rate = self.hparams["noise_rate"])
        valid_ds_clean = CIFAR10NOISY('data/', False, test_transform,
        ↪download=True,
                                asym = False, nosiy_rate = 0)

    elif self.hparams["dataset"] == "CIFAR-100":
        train_ds = CIFAR100NOISY('data/', True, train_transform, download=True,
                                asym = self.hparams["asym_noise"],
                                nosiy_rate = self.hparams["noise_rate"])
        valid_ds_clean = CIFAR100NOISY('data/', False, test_transform,
        ↪download=True,
                                asym = False, nosiy_rate = 0)

    elif self.hparams["dataset"] == "MNIST":
        transform = transforms.Compose([
            transforms.ToTensor(),
            transforms.Normalize((0.5,), (0.5,)),
        ])

        train_ds = MNISTNOISY('data/', True, transform, download=True,
                                asym = self.hparams["asym_noise"],
                                nosiy_rate = self.hparams["noise_rate"])
        valid_ds_clean = MNISTNOISY('data/', False, transform, download=True,
                                asym = False, nosiy_rate = 0)

```

```

# Compute 2 validation datasets, one with clean and one with noisy data
train_size = int(len(train_ds) * self.hparams["train_ratio"])
valid_size = len(valid_ds_clean)
unused_size = len(train_ds) - train_size - len(valid_ds_clean)

train_ds_noisy, valid_ds_noisy, _ = random_split(train_ds, [train_size,
↪valid_size, unused_size])

print(len(train_ds_noisy), len(valid_ds_noisy), len(valid_ds_clean))

self.train_ds = train_ds_noisy
self.valid_ds = (valid_ds_noisy, valid_ds_clean)

def train_dataloader(self):
    return torch.utils.data.DataLoader(
        dataset = self.train_ds,
        batch_size = self.hparams["batch_size"],
        drop_last = True,
        shuffle = True
    )

def val_dataloader(self):
    return torch.utils.data.DataLoader(
        dataset = self.valid_ds[0],
        batch_size = self.hparams["batch_size"],
        shuffle = False,
    ), torch.utils.data.DataLoader(
        dataset = self.valid_ds[1],
        batch_size = self.hparams["batch_size"],
        shuffle = False,
    )

if __name__ == "__main__":

    params = {
        "random_seed": 123,
        "dataset": "CIFAR-100",

        "batch_size": 128,
        "train_ratio": 0.9,

        "max_epochs": 60,

```



```

    "learning_rate":      0.01,
    "lr_scheduler":      "stepped",
    "lr_milestone":      20,
    "conv_l2_reg":       1e-4,
    "fc_l2_reg":         0.01,

    "asym_noise":        False,
    "noise_rate":        0.2,

    "loss_function":     "classical",

    "lambda_1":          1.0,
    "lambda_2":          0.0,
    "lambda_3":          0.0,
    "moments_alpha":     0.01,
    "normalize":         True,

    "wandb_log_hist":    True,
}

# Pass your defaults to wandb.init
wandb.init(config=params)
config = dict(wandb.config)

# Adjust noise magnitude
if config["asym_noise"]:
    config["noise_rate"] /= 2.0

pl.seed_everything(config["random_seed"])
np.random.seed(config["random_seed"])

model = Model(config)

trainer = pl.Trainer(
    gpus=1,
    max_epochs=config["max_epochs"],
    prepare_data_per_node=True,
    progress_bar_refresh_rate=20,
    logger=[csv_logger, WandbLogger()]
)

trainer.fit(model)

wandb.finish()

```

Writing train.py

```
[0]: # Create a sweep

sweep_config = {
    "name": "moments-convex, classical - redo cifar100",
    "program": "train.py",
    "method": "grid",
    "parameters": {
        "loss_function": { "values": ["moments-convex", "classical"]},
        "noise_rate": { "values": [0.2, 0.4, 0.6, 0.8]},
        "random_seed": { "values": [1, 2, 3, 4, 5]},
        "asym_noise": { "values": [0, 1]},
        "lambda_2": { "values": [-0.5]},
        "dataset": { "values": ["CIFAR-100"],},
    }
}

wandb.sweep(sweep_config, project="cifar10-noise")
```

```
[0]: import multiprocessing

multiprocessing.cpu_count()
```

[0]: 4

```
[0]: !wandb agent username/cifar10-noise/2ovul8cc >> agent1.log 2>&1 &
```

```
[0]: !wandb agent username/cifar10-noise/2ovul8cc >> agent2.log 2>&1 &
```

```
[0]: !wandb agent username/cifar10-noise/2ovul8cc >> agent3.log 2>&1 &
```

```
[0]: !wandb agent username/cifar10-noise/2ovul8cc >> agent4.log &
```
